# Supplementary material
Source: Royal Society of Chemistry journal article supplement (doi:10.1039/d6ce00221h)
Supplement: d6ce00221h1.pdf [file d6ce00221h1.pdf]

## Glycine-Mediated Structural Evolution of ZnO Nanoparticles: A Robust Platform for Congo Red Mineralization and Glucose Detection

Jayasimha H N<sup>a\*</sup>, Chandrappa K G<sup>b\*</sup>, Dileepkumar V G<sup>a\*</sup>, Pruthviraj R D<sup>c</sup>, Jobish Johns<sup>c</sup>

<sup>a</sup> Department of Chemistry, HKBK College of Engineering Bangalore – 560045 Karnataka, India

<sup>b</sup> Department of Chemistry, Govt. Engineering College Ramanagar-562159 Karnataka, India

<sup>c</sup> Department of Chemistry, Rajarajeswari College of Engineering, Bangalore, Karnataka, 560074, India

<sup>d</sup> Department of Physics, Rajarajeswari College of Engineering, Bangalore, Karnataka, 560074, India

**Corresponding Authors:** Dr. Jayasimha H N – [Jayasimha.sln@gmail.com](mailto:Jayasimha.sln@gmail.com)

Dr. Chandrappa K G – [Chandu.kodi@gmail.com](mailto:Chandu.kodi@gmail.com)

Dr. Dileepkumar V G – [deepuvg29@gmail.com](mailto:deepuvg29@gmail.com)

**Table S1:** Pseudo first order rate constant values for the degradation of CR dye using glycine mediated ZnO nanoparticles.

| Figure Number | Parameter                           | Rate constant      |         |
|---------------|-------------------------------------|--------------------|---------|
| S2. (a)       | Comparison of different catalysts   | ZnO-U              | 0.00735 |
|               |                                     | ZnO-CA             | 0.01137 |
|               |                                     | ZnO-G              | 0.01396 |
| S2. (b)       | Effect of catalyst dosage           | 10 mg              | 0.0052  |
|               |                                     | 20 mg              | 0.00865 |
|               |                                     | 30 mg              | 0.01396 |
|               |                                     | 40 mg              | 0.01451 |
| S2. (c)       | Effect of initial dye concentration | 10 ppm             | 0.01561 |
|               |                                     | 20 ppm             | 0.01396 |
|               |                                     | 30 ppm             | 0.00912 |
|               |                                     | 40 ppm             | 0.00743 |
| S2. (d)       | Influence of radical scavengers     | No scavengers      | 0.01396 |
|               |                                     | KI                 | 0.00136 |
|               |                                     | CH <sub>3</sub> OH | 0.00294 |
|               |                                     | NaN <sub>3</sub>   | 0.00899 |
| S2. (e)       | Effect of solution pH               | 3                  | 0.01396 |

|         |                    |     |         |
|---------|--------------------|-----|---------|
|         |                    | 6   | 0.01002 |
|         |                    | 9   | 0.00601 |
|         |                    | 12  | 0.00398 |
| S2. (f) | Reusability cycles | n=0 | 0.01396 |
|         |                    | n=1 | 0.01303 |
|         |                    | n=2 | 0.01157 |
|         |                    | n=3 | 0.02779 |

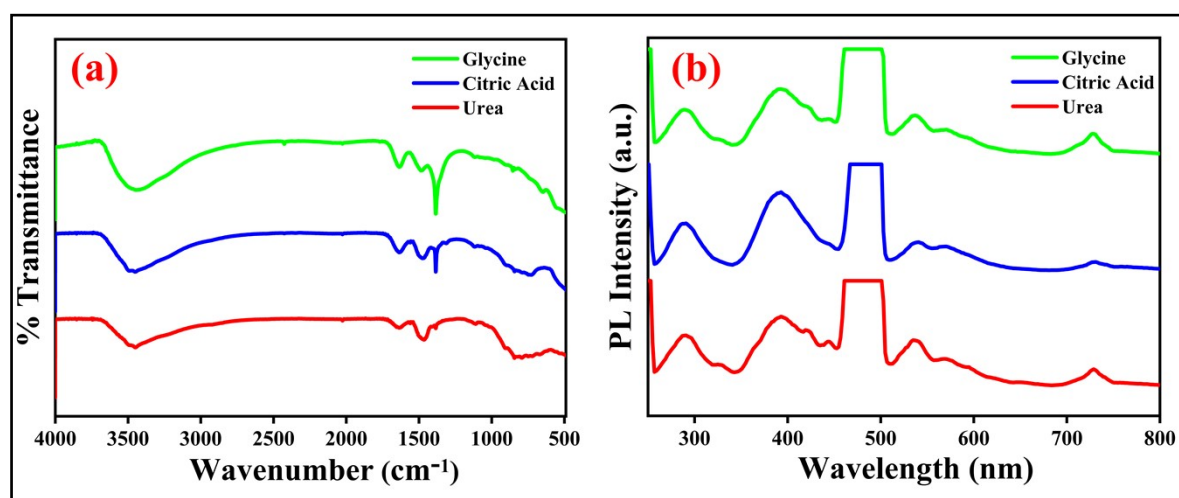

**Figure**

**re S1.** (a) FTIR spectra of ZnO nanoparticles synthesized using glycine, citric acid and urea as fuels, showing the characteristic functional groups and Zn–O vibrational bands; (b) photoluminescence (PL) spectra of ZnO nanoparticles synthesized using different fuels, demonstrating their emission behavior and defect-related optical properties.

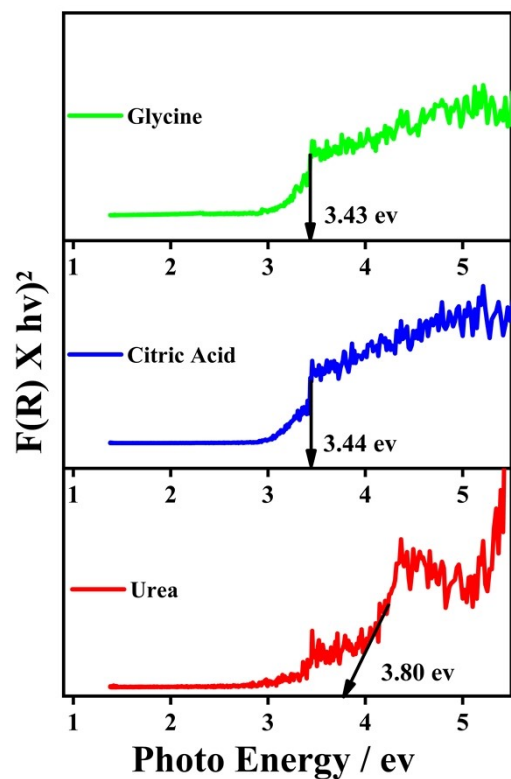

**Figure S2:** UV–DRS spectra and corresponding band gap energies of ZnO nanoparticles synthesized using glycine, citric acid and urea as fuels, showing optical absorption behavior and band gap values of 3.43, 3.44, and 3.80 eV, respectively.

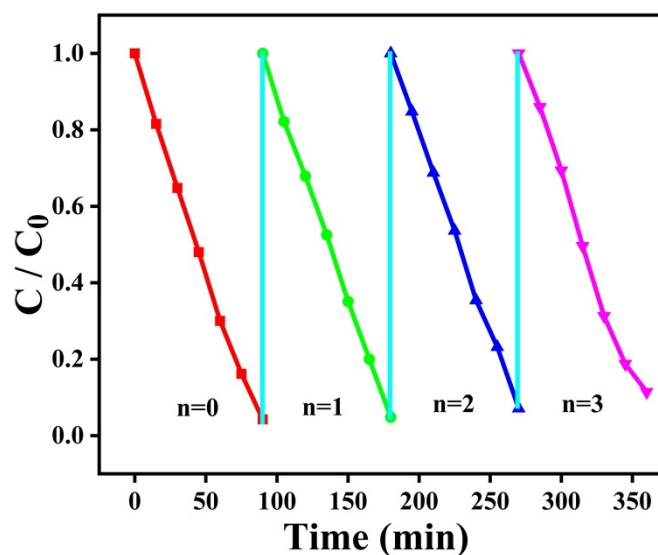

**Figure S3.** Recycling (reusability) test of the catalyst for photocatalytic degradation showing  $C/C_0$  versus time over four consecutive runs ( $n = 0-3$ ).

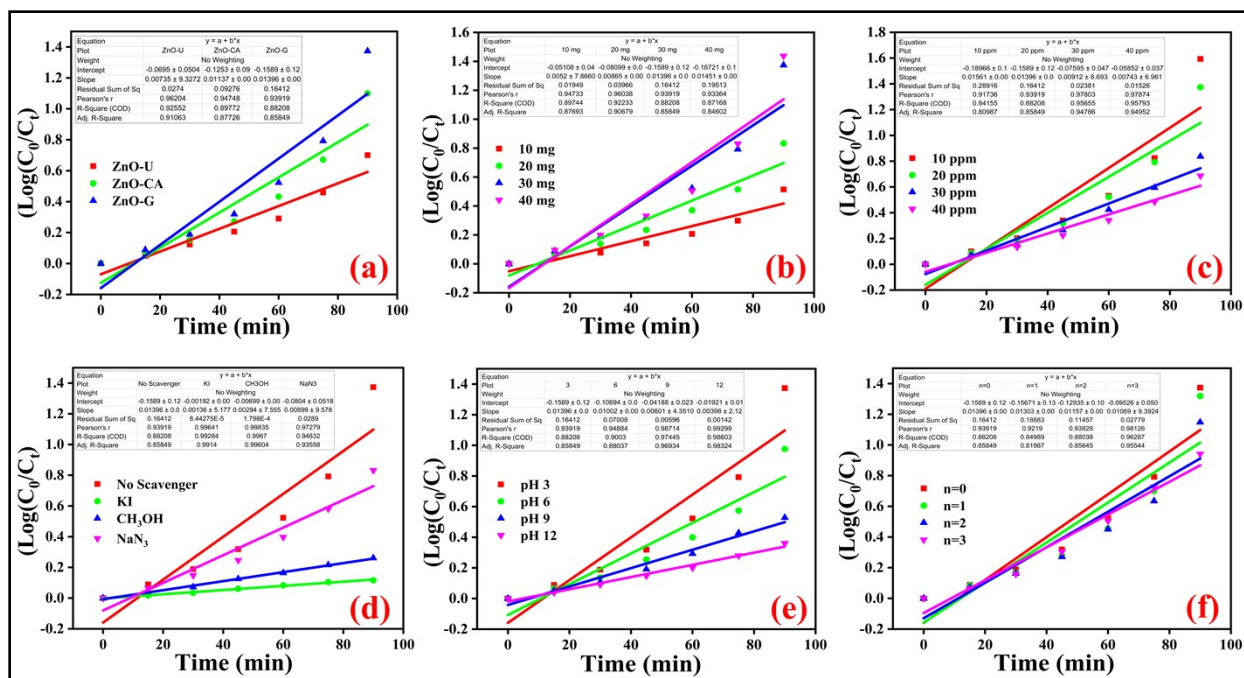

**Figure S4.** Pseudo-first-order kinetic plots for photocatalytic degradation, shown as  $\ln(C_0/C_t)$  versus time under different conditions: (a) Comparison of different catalysts (ZnO-U, ZnO-CA, and ZnO-G), (b) effect of catalyst dosage (10–40 mg), (c) effect of initial dye concentration (10–40 ppm), (d) influence of radical scavengers (no scavenger, KI, CH<sub>3</sub>OH, and NaN<sub>3</sub>), (e) effect of solution pH (3–12) and (f) reusability cycles (n = 0–3).

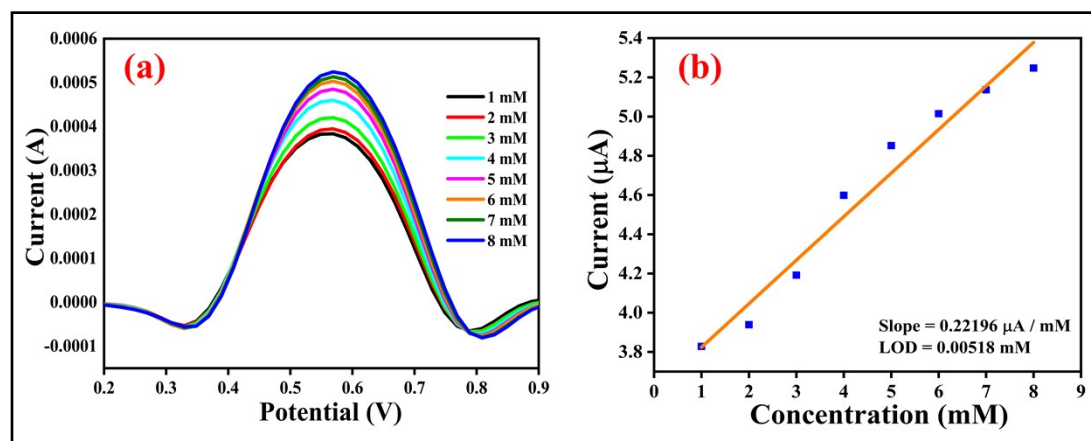

**Figure S5.** (a) Electrochemical current response of the electrode at different analyte concentrations (1–8 mM). (b) Corresponding calibration plot showing a linear relationship between current and concentration, with a sensitivity of 0.22196 μA mM<sup>-1</sup> and a limit of detection (LOD) of 0.00518 mM.
